# Supplementary material for: Alu RNA accumulation induces epithelial-to-mesenchymal transition by modulating miR-566 and is associated with cancer progression
Source: PubMed Central journal article supplement — Oncogene. 2017 Oct 9;37(5):627–37. doi: 10.1038/onc.2017.369 (PMC5799714; doi:10.1038/onc.2017.369), 2017-10-09
Supplement: onc2017369x1.pdf [file onc2017369x1.pdf]

## SUPPLEMENTARY MATERIALS

Antisense sequences:

| Antisense                     | Sequence                                                                                                    |
|-------------------------------|-------------------------------------------------------------------------------------------------------------|
| <i>DICER1</i> as              | 5'-GCUGACCTTTTTGCTUCUCA-3'                                                                                  |
| Ctrl as (of <i>DICER1</i> as) | 5'-TTGGTACGCATACGTGTTGACTGTGA-3'                                                                            |
| <i>Alu</i> as                 | 5'-<br>CCCGGGTTCACGCCATTCTCCTGCCTCAGCCTCACGATAGCTG<br>GGACTACAGGCGCCCGACACCACTCCCGGCTAATTTTTGTATT<br>TTT-3' |
| Ctrl as (of <i>Alu</i> as)    | 5'-<br>GCATGGCCAGTCCATTGATCTTGACGCTTGCCTAGTACGCTC<br>CTCAACCTATCCTCCTAGCCCGTTACTTGGTGCCACCGGCG-3'           |

QPCR Primers:

| Primer                | 5'-Sequence-3'              |
|-----------------------|-----------------------------|
| <i>hDICER1 F</i>      | CCCGGCTGAGAGAACTTACG        |
| <i>hDICER1 R</i>      | CTGTAACCTTCGACCAACACCTTTAAA |
| <i>h18S F</i>         | CGCAGCTAGGAATAATGGAATAGG    |
| <i>h18S R</i>         | GCCTCAGTTCCGAAAACCAA        |
| <i>Alu F</i>          | CAACATAGTGAAACCCCGTCTCT     |
| <i>Alu R</i>          | GCCTCAGCCTCCCGAGTAG         |
| <i>hFibronectin F</i> | CAGTGGGAGACCTCGAGAAG        |
| <i>hFibronectin R</i> | GTCCCTCGGAACATCAGAAA        |
| <i>hE-cadherin F</i>  | GAACGCATTGCCACATACAC        |
| <i>hE-cadherin R</i>  | ATTCGGGCTTGTTGTCATTC        |
| <i>hN-cadherin F</i>  | GGAGATGGGGGAAATTTGTT        |
| <i>hN-cadherin R</i>  | GGTCAAGGTGAAGGTTGGAA        |
| <i>hVimentin F</i>    | TGCCCTTAAAGGAACCAATG        |
| <i>hVimentin R</i>    | CTCAATGTCAAGGGCCATCT        |
| <i>hZEB1 F</i>        | ACTGCTGGGAGGATGACAGA        |
| <i>hZEB1 R</i>        | ATCCTGCTTCATCTGCCTGA        |
| <i>hTWIST1 F</i>      | AGCTACGCCTTCTCGGTCT         |
| <i>hTWIST1 R</i>      | CCTTCTCTGGAAACAATGACAT      |
| <i>hVHL F</i>         | CCCAGGTCATCTTCTGCAAT        |
| <i>hVHL R</i>         | GTGTGTCCCTGCATCTCTGA        |
| <i>hSnail F</i>       | CTTCCAGCAGCCCTACGAC         |
| <i>hSnail R</i>       | CGGTGGGGTTGAGGATCT          |
| <i>hSlug F</i>        | TTCGGACCCACACATTACCT        |
| <i>hSlug R</i>        | GCAGTGAGGGCAAGAAAAA         |
| <i>hZEB2 F</i>        | CAAGAGGCGCAAACAAGC          |
| <i>hZEB2 R</i>        | GGTTGGCAATACCGTCAT          |

Antibodies:

| Antigen          | Vendor           | Catalog Number  |
|------------------|------------------|-----------------|
| DICER1           | Bethyl           | A301-937A       |
| Fibronectin      | Sigma-Aldrich    | F3648           |
| Vimentin         | Cell Signaling   | 5741            |
| E-cadherin       | Cell Signaling   | 5296            |
| Zeb1             | Atlas Antibodies | HPA027524       |
| TWIST1           | Santa Cruz       | sc-1593 (H-25)  |
| $\beta$ -Tubulin | Santa Cruz       | sc-9104 (H-235) |

# Figure S1

**a**

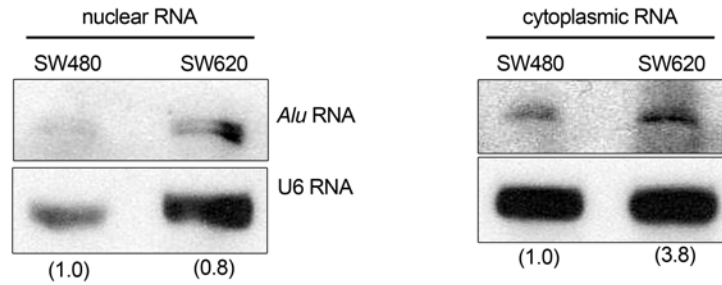

**b**

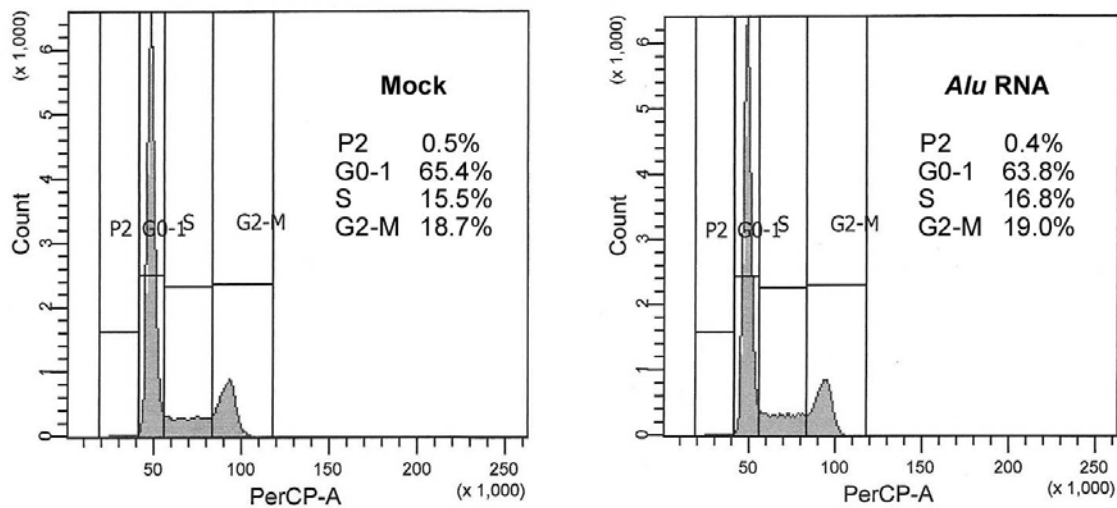

**a)** Northern blot analysis shows *Alu* RNA abundance in nucleus and cytoplasm of SW480 and SW620 cells. Densitometric values normalized against U6 snRNA are shown in parentheses. **b)** *Alu* RNA does not affect SW480 cell cycle. Cell cycle profiles were analyzed by propidium iodide staining and flow cytometry. Tables indicate the cells in the G0/G1, S and G2/M phases of the cell cycle, respectively.

## Figure S2

**a**

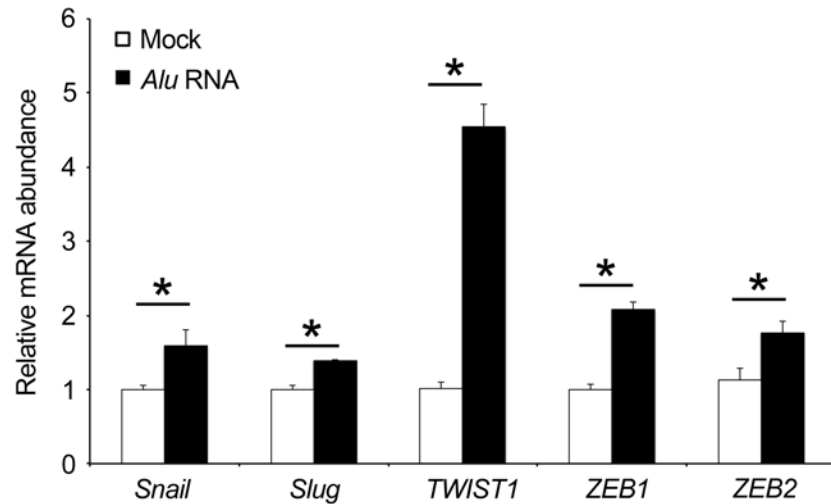

**b**

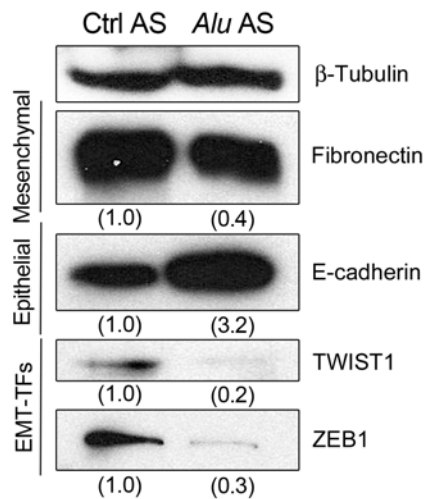

**a)** *Alu* RNA induces the expression of *Snail*, *Slug*, *TWIST1*, *ZEB1* and *ZEB2* mRNAs as evaluated by qRT-PCR and normalized against 18S rRNA. **b)** *Alu* RNA knockdown obtained transfecting an antisense oligonucleotide (*Alu* AS), decreases the expression of Fibronectin and EMT-TFs (*TWIST1* and *ZEB1*) and increases that of E-cadherin compared

to cell transfected with a scramble oligonucleotide (Ctrl AS), as evaluated by western blot. Densitometric values normalized against  $\beta$ -Tubulin are shown in parentheses. Data represent as mean +SEM (error bars) (n=3),  $p < 0.05$ .

# Figure S3

a

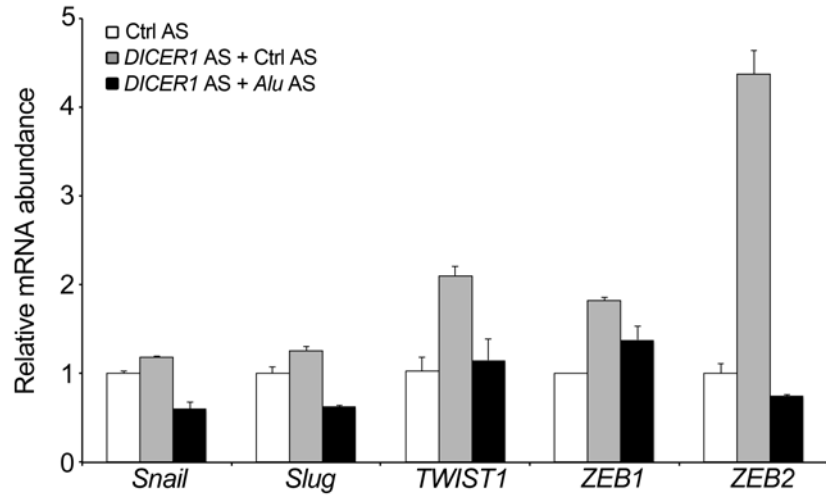

b

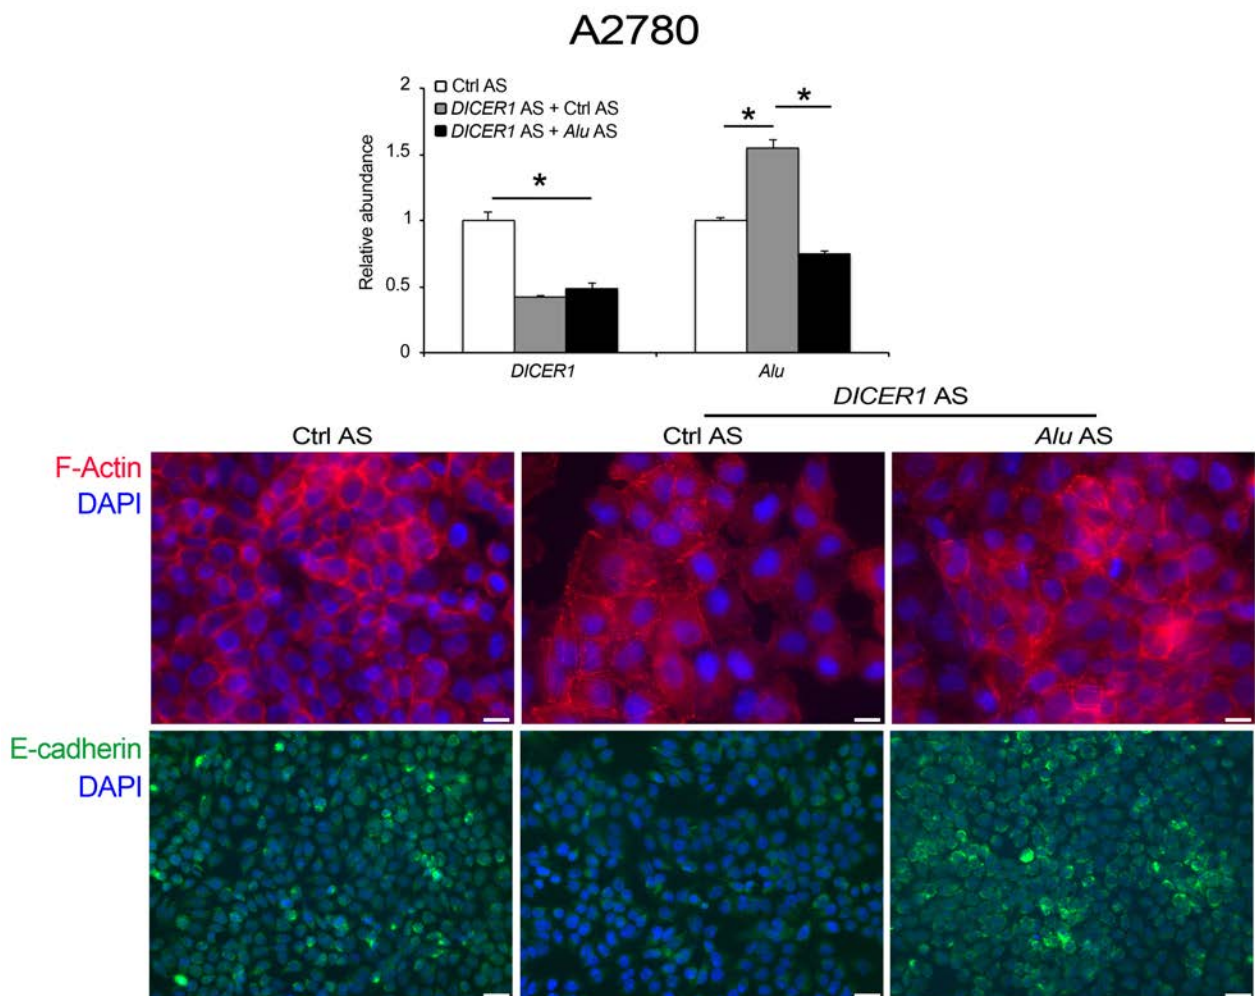

C

A498

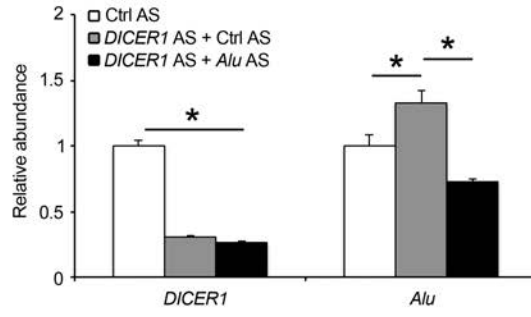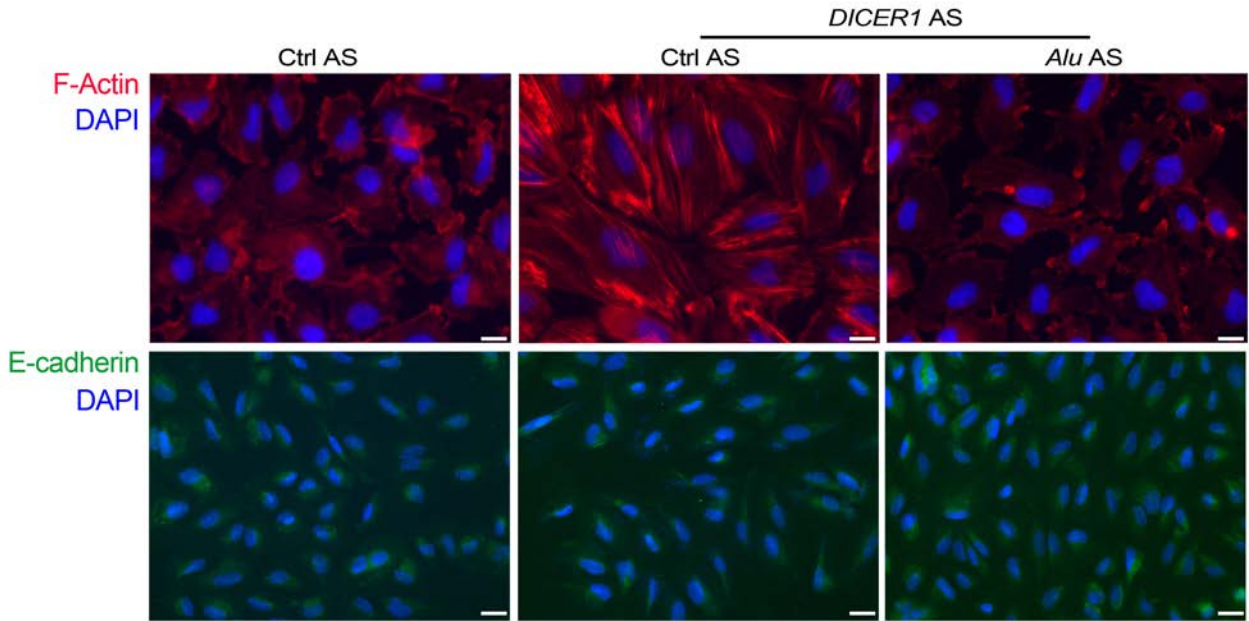

**d**

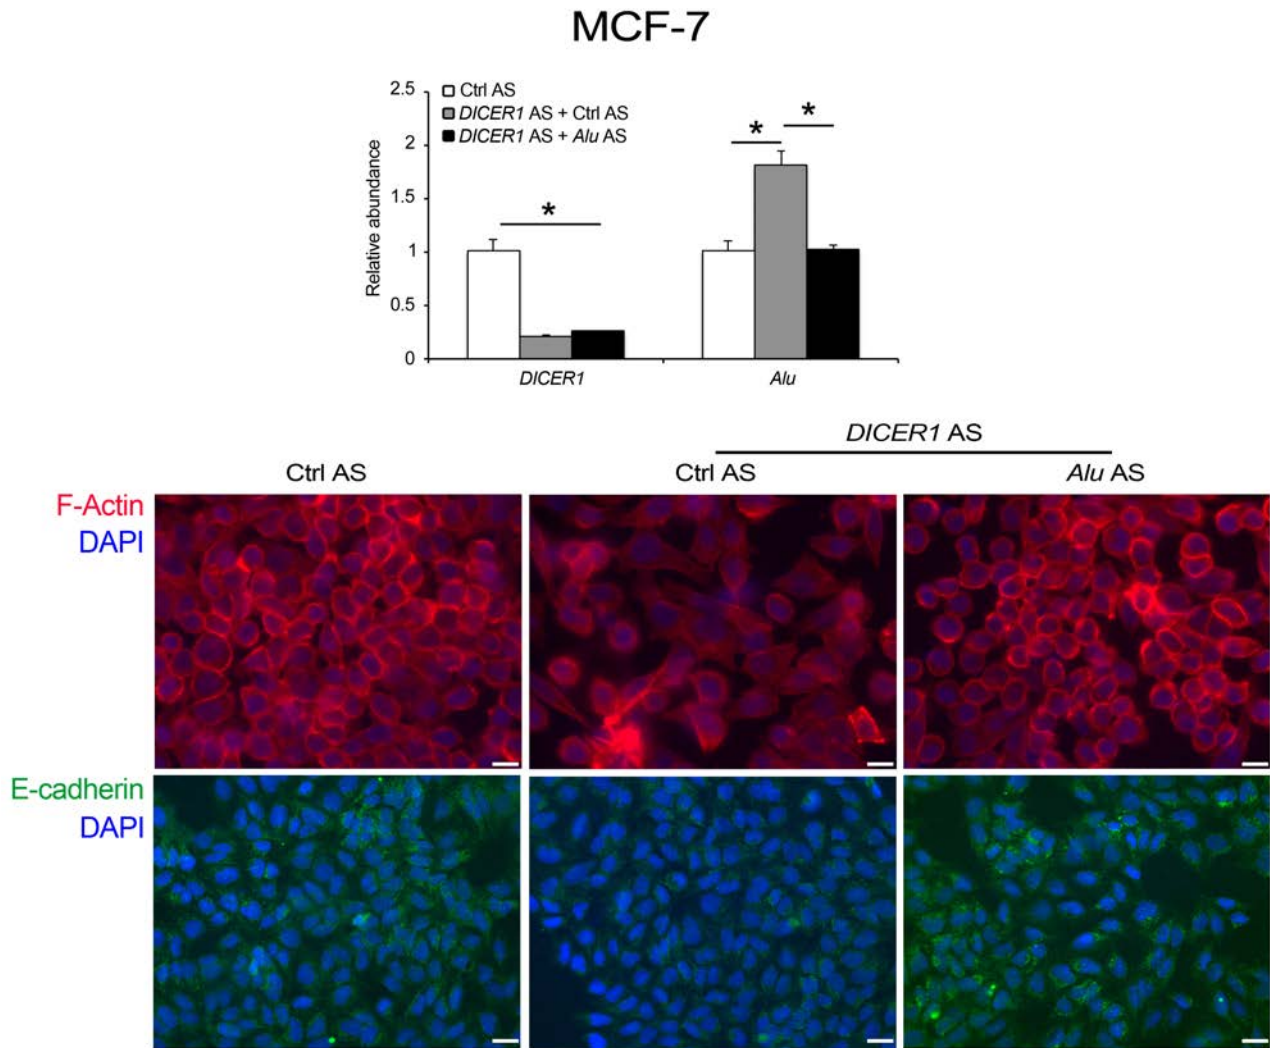

**a)** *DICER1* AS increases the expression of *Snail*, *Slug*, *TWIST1*, *ZEB1* and *ZEB2* mRNAs and the co-transfection of *Alu* AS reduces the expression as evaluated by qRT-PCR and normalized against 18S rRNA. Data represent as mean  $\pm$ SEM (error bars). *Alu* RNA accumulate as consequence of *DICER1* deficit in A2780 (**b**), A498 (**c**) and MCF-7 (**d**) cells and the co-transfection of *Alu* AS is able to inhibit their accumulation and the *DICER1*-induced EMT as showed by F-Actin and E-cadherin staining. Representative images of F-actin (red) and E-cadherin (green) staining. Nuclei are counterstained with DAPI (blue). Scale bar: 75  $\mu$ m.



# Figure S4

**a**

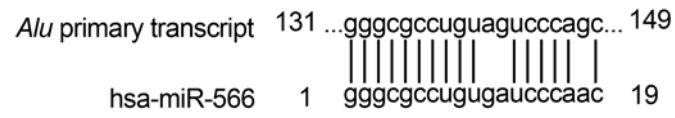

**b**

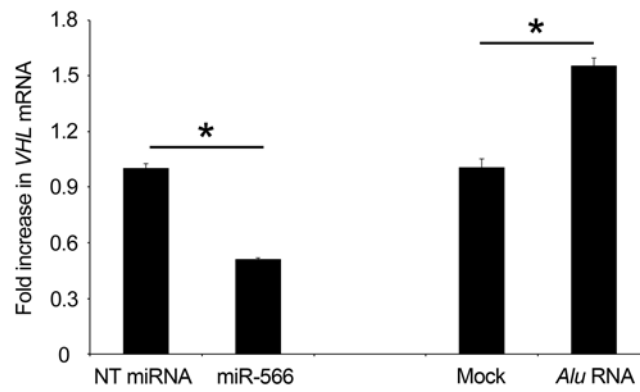

**c**

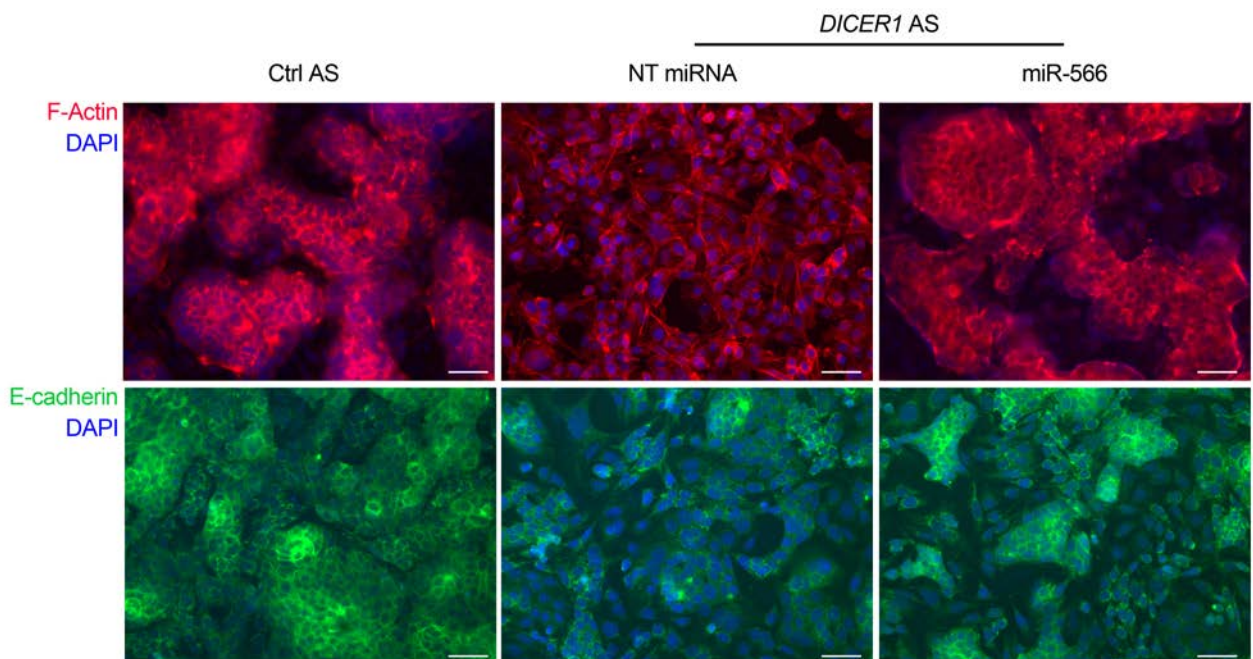

**d**

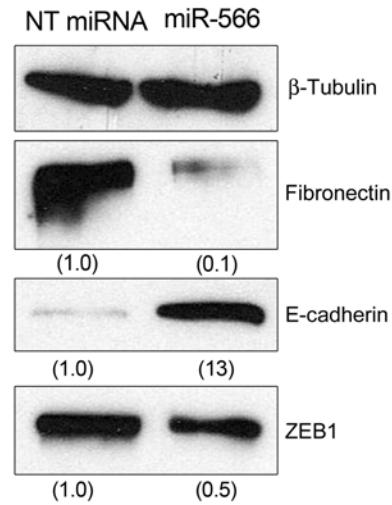

(a) Base-pairing between human *Alu* primary transcript (GenBank: U67825; clone TS 103) and miR-566 (b) miR-566 reduces and *Alu* RNA increases the abundance of *VHL* mRNA as evaluated by qRT-PCR and normalized against 18S rRNA. Data represent as mean +SEM (error bars) (n=3), p<0.05. (c) miR-566 recues the DICER1 deficit-induced EMT. Representative images of F-actin (red) and E-cadherin (green) staining. Nuclei are counterstained with DAPI (blue). Scale bar: 75  $\mu$ m. (d) miR-566 transfection in SW620 decreases the protein abundance of Fibronectin and ZEB1 and increases E-cadherin level as evaluated by western blot. Densitometric values normalized against  $\beta$ -Tubulin are shown in parentheses. For all panels: n=3; \*p<0.05. Error bars denote SEM.

# Figure S5

a

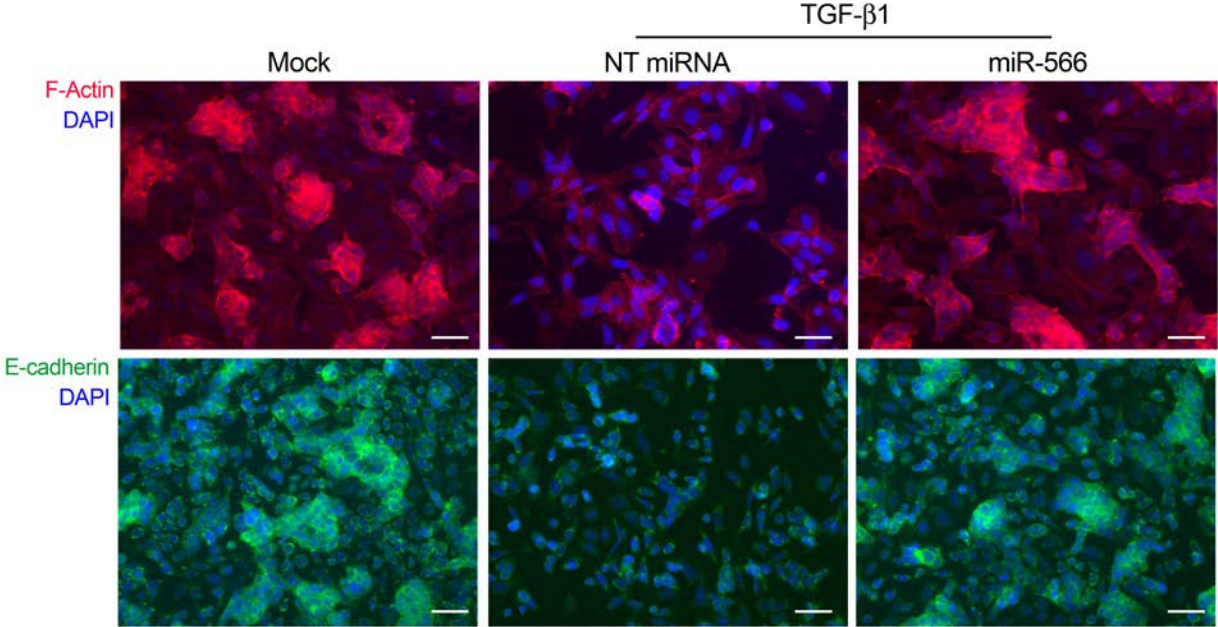

b

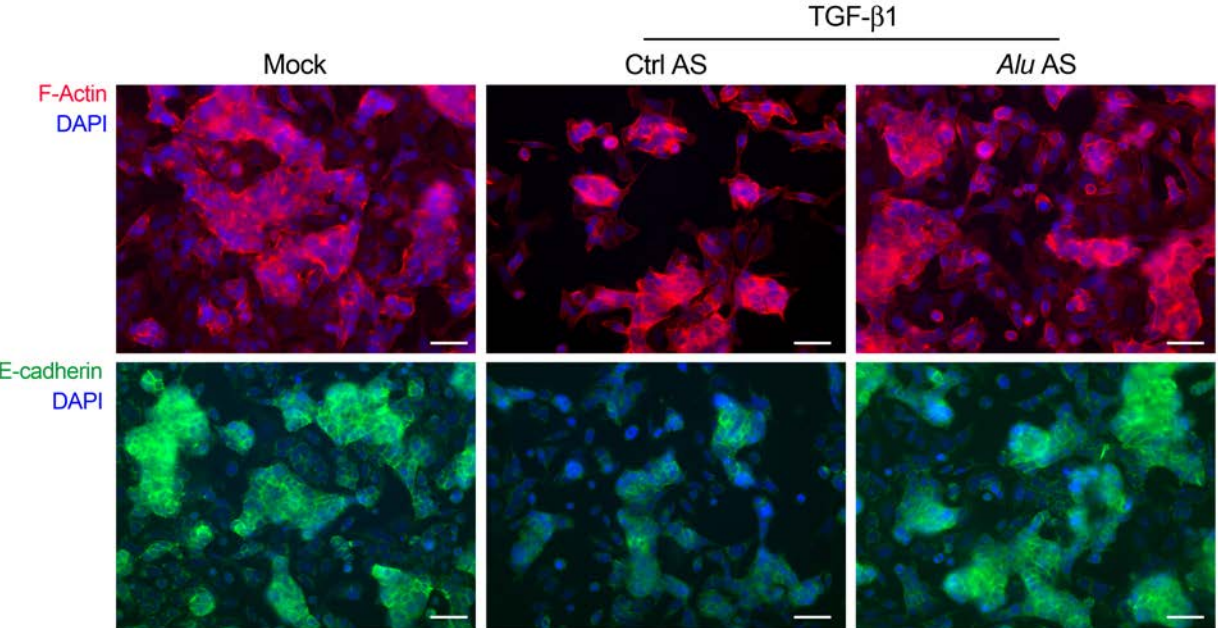

**C**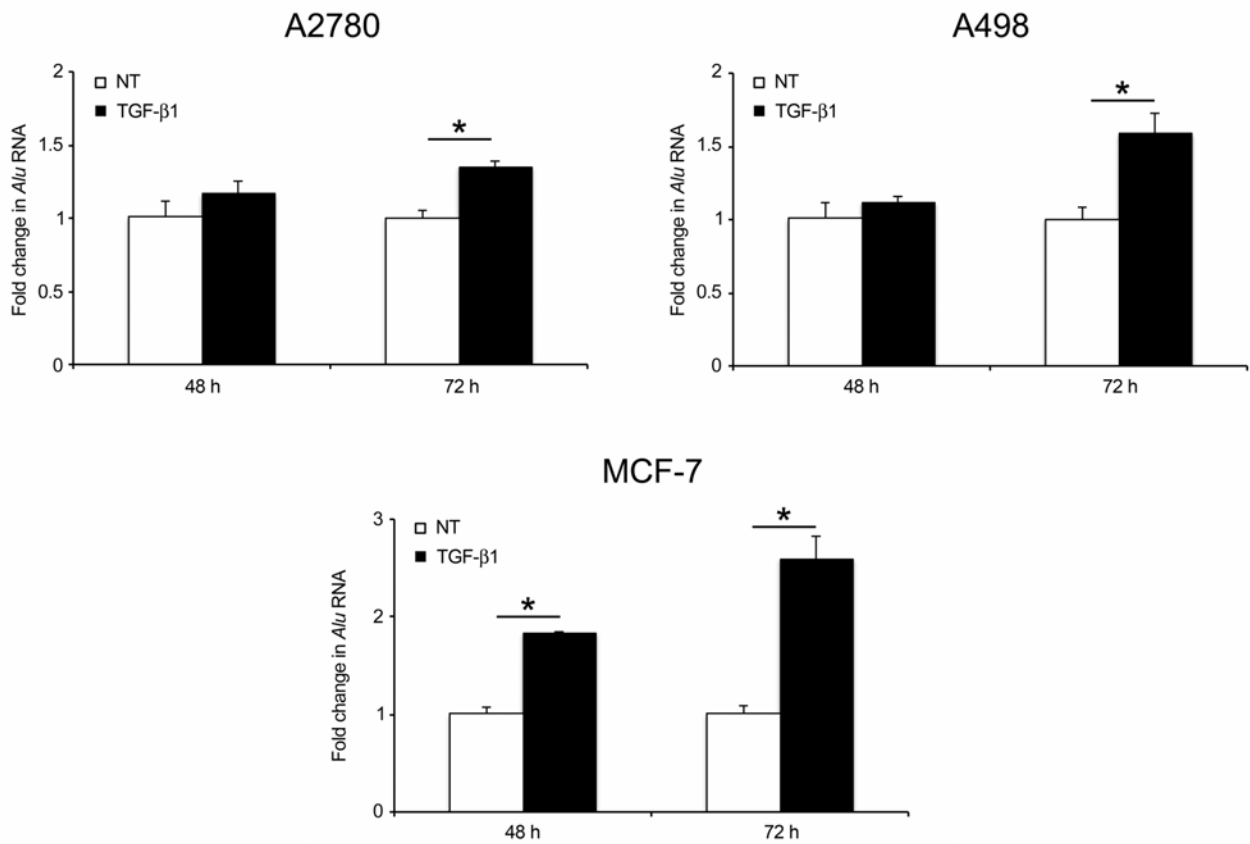

Representative images of F-Actin (red) and E-cadherin (green) staining of SW480 cells treated with TGF- $\beta$ 1 and then transfected with a) NT miRNA or miR-566 and b) Ctrl AS or *Alu* AS. Nuclei are counterstained with DAPI (blue). Scale bar: 75  $\mu$ m. c) TGF- $\beta$ 1 increases the abundance of *Alu* Pol III-derived transcripts as evaluated by qRT-PCR analysis in A2780, in A498 and in MCF-7. Data represent as mean +SEM (error bars) (n=3), p<0.05.
